# Supplementary material for: Body distribution of stable copper isotopes during the progression of cholestatic liver disease induced by common bile duct ligation in mice
Source: Royal Society of Chemistry journal article supplement (doi:10.1039/c8mt00362a), 2019-04-16
Supplement: c8mt00362a1.pdf [file c8mt00362a1.pdf]

# **Body distribution of stable copper isotopes during the progression of cholestatic liver disease induced by common bile duct ligation in mice**

**Marta Costas-Rodríguez,<sup>a†</sup> Sanne Van Campenhout,<sup>b†</sup> Agustina A.M.B. Hastuti,<sup>a</sup> Lindsey  
Devisscher,<sup>c</sup> Hans Van Vlierberghe<sup>b\*</sup> and Frank Vanhaecke<sup>a\*</sup>**

<sup>a</sup> Ghent University, Department of Chemistry, Atomic & Mass Spectrometry – A&MS research unit, Campus Sterre, Krijgslaan 281-S12, BE-9000 Ghent, Belgium.

<sup>b</sup> Ghent University, Department of Internal Medicine and Pediatrics, Corneel Heymanslaan 10-UZ-Entrance12-Floor01, BE-9000 Ghent, Belgium.

<sup>c</sup> Ghent University, Department of Basic and Applied Medical Sciences, Corneel Heymanslaan 10-UZ-Entrance36-Floor03, BE-9000 Ghent, Belgium.

† Both authors contributed equally to this work.

\* Corresponding authors e-mail:

[frank.vanhaecke@ugent.be](mailto:frank.vanhaecke@ugent.be)

[hans.vanvlierberghe@ugent.be](mailto:hans.vanvlierberghe@ugent.be)

## **Supplementary material**

**Figures S1-S2**

**Tables S1-S2**

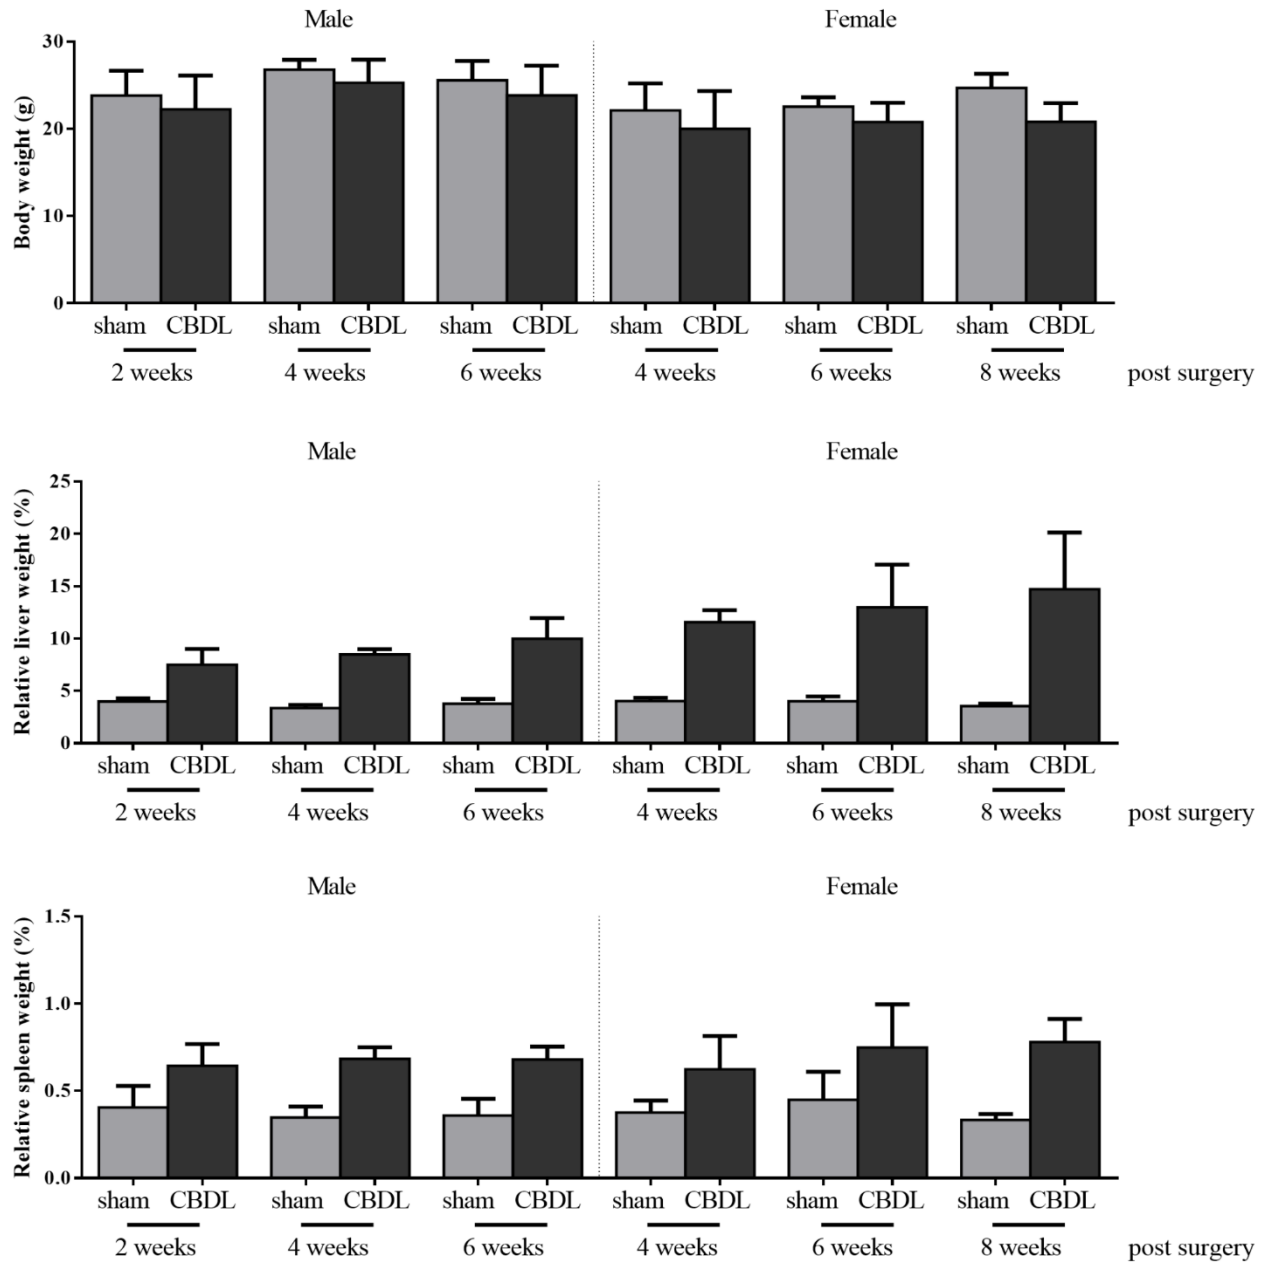

**Figure S1: Body, liver and spleen weights of sham- and CBDL-operated mice 2, 4, 6 and 8 weeks post-surgery.** Results are presented as the mean  $\pm$  95% confidence interval (n=5-7). Liver and spleen weights are given relative to total body weight. Statistical analysis was performed using a univariate three-factorial analysis of variance. A significant effect of surgery type (p=0.001), gender (p=0.000) and the time post-surgery (p=0.033) on total body weight was observed without interaction effects. Significant effects of operation type were also observed for relative liver and spleen weight (both p=0.000) with an interaction between gender and the time post-surgery for relative liver weight (p=0.047).

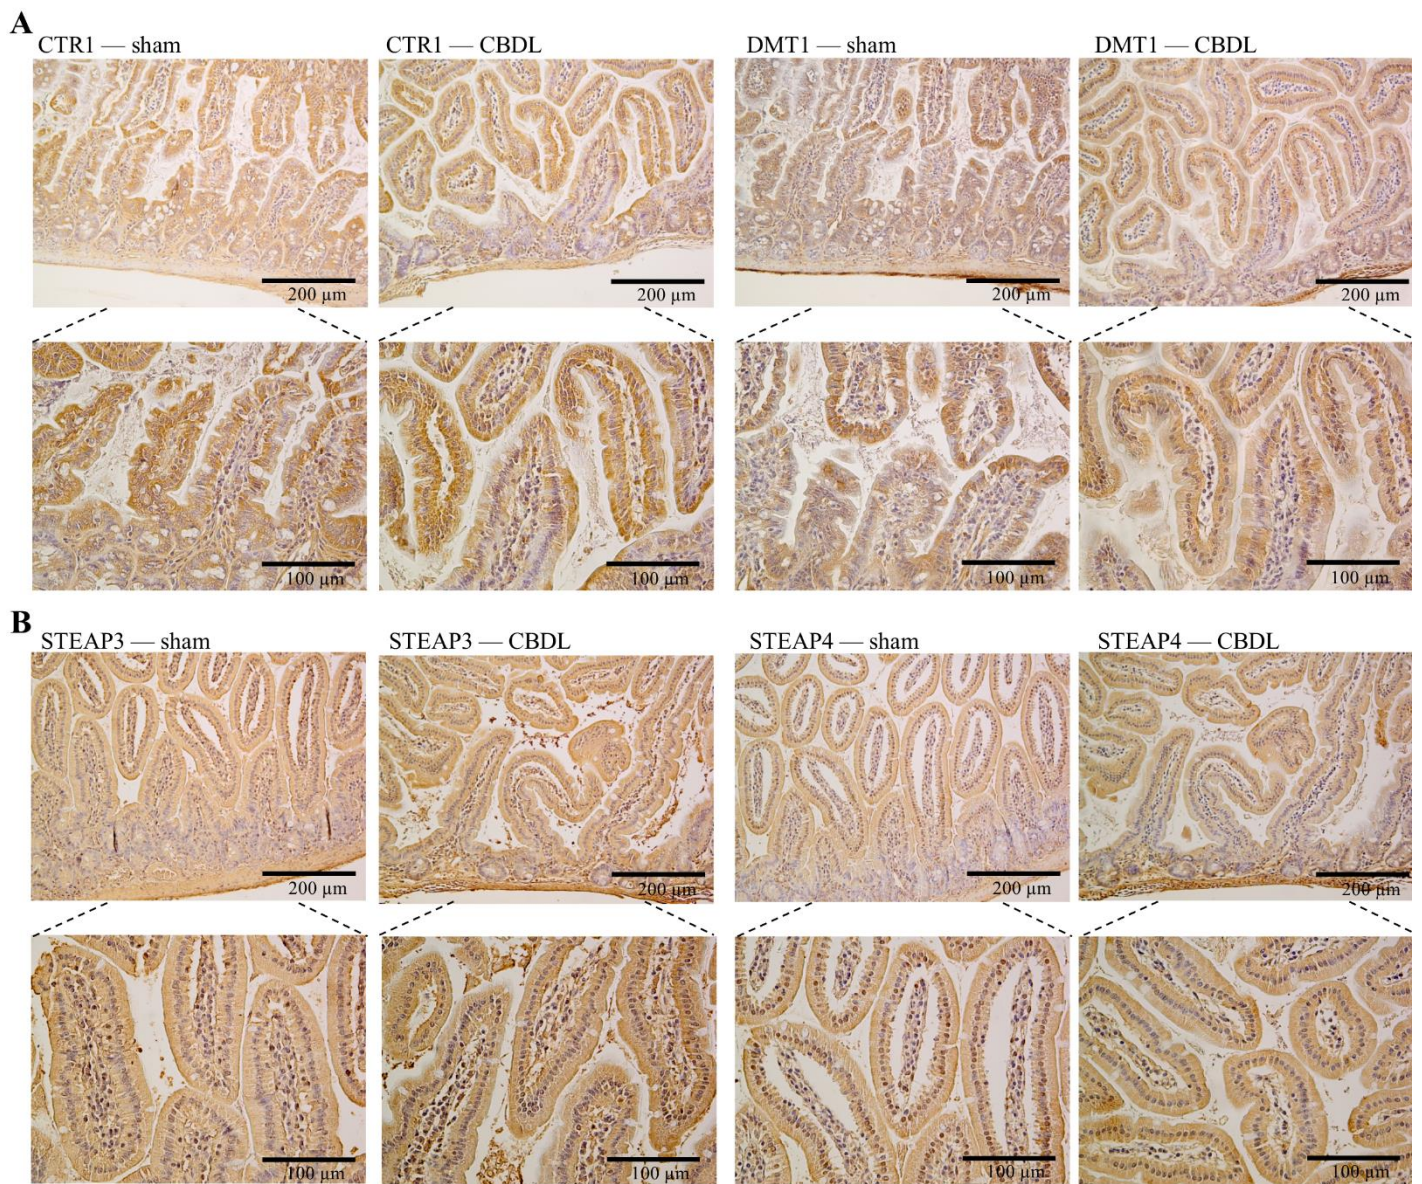

**Figure S2: Immunohistochemical stainings on duodenum tissue of sham- and CBDL-operated mice 4 weeks post-surgery. A. Tissue stained for metal receptors CTR1 and DMT1. B. Tissue stained for copper reductases STEAP3 and STEAP4.**

**Table S1: Quantitative RT-PCR Primers.**

| <b>Gene</b>           | <b>Forward primer</b>  | <b>Reverse primer</b>     |
|-----------------------|------------------------|---------------------------|
| <i>Gapdh</i>          | CATGGCCTTCCGTGTTCCCTA  | GCGGCACGTCAGATCCA         |
| <i>Hmbs</i>           | AAGGGCTTTTCTGAGGCACC   | AGTTGCCCATCTTTCATCACTG    |
| <i>Hprt</i>           | GTTAAGCAGTACAGCCCCAAA  | AGGGCATATCCAACAACAAACTT   |
| <i>Sdha</i>           | CTTGAATGAGGCTGACTGTG   | ATCACATAAGCTGGTCCTGT      |
| <i>Slc31a1(CTR1)</i>  | GCCTTCGTGGCAGTGTTTTTA  | GCGAATGCTGACTTGAGACTTTC   |
| <i>Slc31a2(CTR2)</i>  | GGCTTTACTGTTGATGCACTCC | CTGGATGCCCAAGTAGTAGTTTC   |
| <i>Slc11a2 (DMT1)</i> | GTA CTCAGGGGCATGTTCGT  | GTTGTGCGGCATGATCACAG      |
| <i>Steap2</i>         | CCAGAATCCAATGCAGAGTACC | GCCCAAGCTGAGATCACATTA AAA |
| <i>Steap3</i>         | CAGGGGCTGGGAGAAAGATG   | CCCACAAGCCATCTCCACTT      |
| <i>Steap4</i>         | ACCTCCCTGGTATTCTCGCT   | AGCATCCAATGGTCAAGCCA      |
| <i>Cybrd1</i>         | ACAGTGATTGCGACGGTTCT   | GGTACGAGGGGTGTTTCAGG      |
| <i>Atox1</i>          | CGAGTTCTCCGTGGACATGA   | CACTCCTCCCAGCTTGTTGA      |
| <i>Atp7a</i>          | ACCTCTCCAGAAACCTTGCG   | TCCAGTGAGGGCTGAGCTAT      |
| <i>Ccs</i>            | TGGCATCATTGCACGCTCT    | GAGTCCTTTCGGCCTTGACC      |
| <i>Sod1</i>           | TATGGGGACAATACACAAGGCT | CCACCATGTTTCTTAGAGTGAGG   |

**Table S2. Copper isotopic composition and concentrations in the sham- and CBDL-operated mice 2, 4, 6 and 8 weeks post-surgery.** Cu concentrations in organs are expressed in  $\mu\text{g/g}$  wet weight. The relative standard deviation of the Cu concentrations was  $\leq 3\%$ . Delta values are expressed as average  $\pm$  standard deviation (for n=1-3 measurement replicates).

| Sample | Description | Individual ID/<br>Gender | Cu concentration,<br>$\mu\text{g g}^{-1}$ | $\delta^{65}\text{Cu} \pm \text{sd} (\text{‰})$ |
|--------|-------------|--------------------------|-------------------------------------------|-------------------------------------------------|
| Liver  | Sham, 2 w   | 1M                       | 3.31                                      | $0.10 \pm 0.03$                                 |
|        |             | 2M                       | 3.61                                      | $0.27 \pm 0.02$                                 |
|        |             | 3M                       | 3.43                                      | $0.13 \pm 0.02$                                 |
|        | CBDL, 2 w   | 4M                       | 10.7                                      | $-0.67 \pm 0.01$                                |
|        |             | 5M                       | 17.8                                      | $-0.62 \pm 0.01$                                |
|        |             | 6M                       | 14.1                                      | $-0.84 \pm 0.01$                                |
|        |             | 7M                       | 13.8                                      | $-0.58 \pm 0.06$                                |
|        | Sham, 4 w   | 8M                       | 4.52                                      | $0.20 \pm 0.01$                                 |
|        |             | 9M                       | 4.46                                      | $0.41 \pm 0.01$                                 |
|        |             | 10M                      | 3.37                                      | $0.22 \pm 0.03$                                 |
|        | CBDL, 4 w   | 11M                      | 29.2                                      | $-0.59 \pm 0.01$                                |
|        |             | 12M                      | 27.0                                      | $-0.83 \pm 0.01$                                |
|        |             | 13M                      | 35.6                                      | $-0.81 \pm 0.04$                                |
|        |             | 14M                      | 16.1                                      | $-0.55 \pm 0.02$                                |
|        | Sham, 6 w   | 15M                      | 4.96                                      | $0.35 \pm 0.01$                                 |
|        |             | 16M                      | 3.67                                      | $0.18 \pm 0.03$                                 |
|        |             | 17M                      | 3.33                                      | $0.24 \pm 0.01$                                 |
|        | CBDL, 6 w   | 18M                      | 42.0                                      | $-0.70 \pm 0.01$                                |
|        |             | 19M                      | 62.4                                      | $-0.83 \pm 0.01$                                |
|        |             | 20M                      | 49.8                                      | $-0.46 \pm 0.02$                                |
|        |             | 21M                      | 20.4                                      | $-0.73 \pm 0.01$                                |
|        | Sham, 4 w   | 22F                      | 2.87                                      | $0.31 \pm 0.01$                                 |
|        |             | 23F                      | 2.50                                      | $0.25 \pm 0.01$                                 |
|        |             | 24F                      | 2.65                                      | $0.32 \pm 0.01$                                 |
|        | CBDL, 4 w   | 25F                      | 15.0                                      | $-0.71 \pm 0.01$                                |
|        |             | 26F                      | 8.74                                      | $-0.90 \pm 0.01$                                |
|        |             | 27F                      | 10.1                                      | $-0.68 \pm 0.03$                                |
|        |             | 28F                      | 14.2                                      | $-0.80 \pm 0.02$                                |
|        | Sham, 6 w   | 29F                      | 3.03                                      | $0.24 \pm 0.03$                                 |
|        |             | 30F                      | 3.09                                      | $0.33 \pm 0.02$                                 |
|        |             | 31F                      | 2.40                                      | $0.33 \pm 0.02$                                 |
|        | CBDL, 6 w   | 32F                      | 23.1                                      | $-0.65 \pm 0.01$                                |
|        |             | 33F                      | 13.9                                      | $-0.83 \pm 0.01$                                |
|        |             | 34F                      | 34.8                                      | $-0.51 \pm 0.06$                                |
|        |             | 35F                      | 22.1                                      | $-0.90 \pm 0.01$                                |

| Sample    | Description | Individual ID/<br>Gender | Cu concentration,<br>$\mu\text{g g}^{-1}$ | $\delta^{65}\text{Cu} \pm \text{sd} (\text{‰})$ |
|-----------|-------------|--------------------------|-------------------------------------------|-------------------------------------------------|
| Liver     | Sham, 8 w   | 36F                      | 2.97                                      | $0.34 \pm 0.02$                                 |
|           |             | 37F                      | 3.30                                      | $0.42 \pm 0.01$                                 |
|           |             | 38F                      | 3.40                                      | $0.31 \pm 0.05$                                 |
|           | CBDL, 8 w   | 39F                      | 18.8                                      | $-0.90 \pm 0.06$                                |
|           |             | 40F                      | 13.7                                      | $-0.94 \pm 0.01$                                |
|           |             | 41F                      | 14.1                                      | $-0.97 \pm 0.02$                                |
|           |             | 42F                      | 17.2                                      | $-1.18 \pm 0.05$                                |
| Kidney    | Sham, 2 w   | 2M                       | 4.29                                      | $1.35 \pm 0.02$                                 |
|           |             | 3M                       | 3.86                                      | $1.65 \pm 0.06$                                 |
|           | CBDL, 2 w   | 4M                       | 3.87                                      | $1.02 \pm 0.02$                                 |
|           |             | 7M                       | 3.65                                      | $1.15 \pm 0.01$                                 |
|           | Sham, 4 w   | 8M                       | 3.75                                      | $1.92 \pm 0.02$                                 |
|           |             | 9M                       | 2.81                                      | $1.91 \pm 0.04$                                 |
|           | CBDL, 4 w   | 11M                      | 3.49                                      | $0.55 \pm 0.02$                                 |
|           |             | 12M                      | 4.20                                      | $0.98 \pm 0.01$                                 |
|           | Sham, 6 w   | 15M                      | 3.09                                      | $1.87 \pm 0.06$                                 |
|           |             | 16M                      | 3.46                                      | $1.72 \pm 0.08$                                 |
|           | CBDL, 6 w   | 18M                      | 4.16                                      | $0.85 \pm 0.01$                                 |
|           |             | 19M                      | 4.04                                      | $0.72 \pm 0.04$                                 |
|           | Sham, 4 w   | 22F                      | 4.29                                      | $1.35 \pm 0.02$                                 |
|           |             | 23F                      | 3.86                                      | $1.65 \pm 0.06$                                 |
|           | CBDL, 4 w   | 25F                      | 3.87                                      | $1.02 \pm 0.02$                                 |
|           |             | 26F                      | 3.65                                      | $1.15 \pm 0.01$                                 |
|           | Sham, 6 w   | 30F                      | 3.75                                      | $1.92 \pm 0.02$                                 |
|           |             | 31F                      | 2.81                                      | $1.91 \pm 0.04$                                 |
|           | CBDL, 6 w   | 32M                      | 3.49                                      | $0.55 \pm 0.02$                                 |
|           |             | 33F                      | 4.20                                      | $0.98 \pm 0.01$                                 |
| Sham, 8 w | 36F         | 3.09                     | $1.87 \pm 0.06$                           |                                                 |
|           | 37F         | 3.46                     | $1.72 \pm 0.08$                           |                                                 |
| CBDL, 8 w | 39F         | 4.16                     | $0.85 \pm 0.01$                           |                                                 |
|           | 40F         | 4.04                     | $0.72 \pm 0.04$                           |                                                 |
| Brain     | Sham, 2 w   | 2M                       | 4.32                                      | $0.58 \pm 0.07$                                 |
|           |             | 3M                       | 2.96                                      | $0.86 \pm 0.01$                                 |
|           | CBDL, 2 w   | 4M                       | 2.93                                      | $0.90 \pm 0.08$                                 |
|           |             | 7M                       | 3.09                                      | $0.95 \pm 0.03$                                 |
|           | Sham, 4 w   | 8M                       | 2.37                                      | $0.80 \pm 0.05$                                 |
|           |             | 9M                       | 3.26                                      | $0.98 \pm 0.04$                                 |
|           | CBDL, 4 w   | 11M                      | 3.51                                      | $0.58 \pm 0.08$                                 |
|           |             | 12M                      | 3.38                                      | $0.72 \pm 0.06$                                 |
|           | Sham, 6 w   | 15M                      | 3.01                                      | $0.85 \pm 0.08$                                 |
|           |             | 16M                      | 3.38                                      | $0.91 \pm 0.01$                                 |

| Sample    | Description | Individual ID/<br>Gender | Cu concentration,<br>$\mu\text{g g}^{-1}$ | $\delta^{65}\text{Cu} \pm \text{sd} (\text{‰})$ |
|-----------|-------------|--------------------------|-------------------------------------------|-------------------------------------------------|
| Brain     | CBDL, 6 w   | 18M                      | 3.60                                      | $0.67 \pm 0.07$                                 |
|           |             | 19M                      | 3.47                                      | $0.71 \pm 0.06$                                 |
|           | Sham, 4 w   | 22F                      | 3.24                                      | $0.95 \pm 0.01$                                 |
|           |             | 23F                      | 3.09                                      | $0.92 \pm 0.04$                                 |
|           | CBDL, 4 w   | 25F                      | 3.45                                      | $0.84 \pm 0.01$                                 |
|           |             | 26F                      | 3.46                                      | $0.81 \pm 0.02$                                 |
|           | Sham, 6 w   | 30F                      | 3.08                                      | $0.93 \pm 0.04$                                 |
|           |             | 31F                      | 3.07                                      | $0.95 \pm 0.03$                                 |
|           | CBDL, 6 w   | 32M                      | 3.81                                      | $0.72 \pm 0.01$                                 |
|           |             | 33F                      | 3.80                                      | $0.66 \pm 0.04$                                 |
|           | Sham, 8 w   | 36F                      | 3.29                                      | $0.89 \pm 0.06$                                 |
|           |             | 37F                      | 3.54                                      | $0.81 \pm 0.02$                                 |
|           | CBDL, 8 w   | 39F                      | 3.98                                      | $0.53 \pm 0.03$                                 |
|           |             | 40F                      | 3.63                                      | $0.67 \pm 0.01$                                 |
| Heart     | Sham, 2 w   | 2M                       | 5.75                                      | $0.08 \pm 0.04$                                 |
|           |             | 3M                       | 6.33                                      | $0.34 \pm 0.01$                                 |
|           | CBDL, 2 w   | 4M                       | 4.90                                      | $0.11 \pm 0.03$                                 |
|           |             | 7M                       | 5.22                                      | $0.22 \pm 0.04$                                 |
|           | Sham, 4 w   | 8M                       | 4.33                                      | $0.27 \pm 0.03$                                 |
|           |             | 9M                       | 6.23                                      | $0.48 \pm 0.03$                                 |
|           | CBDL, 4 w   | 11M                      | 5.79                                      | $-0.14 \pm 0.04$                                |
|           |             | 12M                      | 5.05                                      | $-0.04 \pm 0.02$                                |
|           | Sham, 6 w   | 15M                      | 5.50                                      | $0.36 \pm 0.01$                                 |
|           |             | 16M                      | 5.11                                      | $0.27 \pm 0.07$                                 |
|           | CBDL, 6 w   | 18M                      | 6.15                                      | $-0.09 \pm 0.04$                                |
|           |             | 19M                      | 5.07                                      | $-0.15 \pm 0.01$                                |
|           | Sham, 4 w   | 22F                      | 6.03                                      | $0.28 \pm 0.03$                                 |
|           |             | 23F                      | 5.91                                      | $0.40 \pm 0.04$                                 |
|           | CBDL, 4 w   | 25F                      | 5.59                                      | $-0.01 \pm 0.04$                                |
|           |             | 26F                      | 6.74                                      | $-0.05 \pm 0.04$                                |
|           | Sham, 6 w   | 30F                      | 4.72                                      | $0.26 \pm 0.04$                                 |
|           |             | 31F                      | 4.21                                      | $0.29 \pm 0.01$                                 |
|           | CBDL, 6 w   | 32M                      | 5.73                                      | $0.01 \pm 0.04$                                 |
|           |             | 33F                      | 5.68                                      | $-0.11 \pm 0.04$                                |
| Sham, 8 w | 36F         | 5.09                     | $0.26 \pm 0.03$                           |                                                 |
|           | 37F         | 4.80                     | $0.29 \pm 0.03$                           |                                                 |
| CBDL, 8 w | 39F         | 5.35                     | $-0.34 \pm 0.05$                          |                                                 |
|           | 40F         | 5.64                     | $-0.34 \pm 0.06$                          |                                                 |
| Spleen    | Sham, 2 w   | 2M                       | 1.50                                      | $-0.08 \pm 0.00$                                |
|           |             | 3M                       | 1.10                                      | $0.00 \pm 0.02$                                 |

| Sample    | Description | Individual ID/<br>Gender | Cu concentration,<br>$\mu\text{g g}^{-1}$ | $\delta^{65}\text{Cu} \pm \text{sd} (\text{‰})$ |
|-----------|-------------|--------------------------|-------------------------------------------|-------------------------------------------------|
| Spleen    | CBDL, 2 w   | 4M                       | 2.23                                      | $-0.40 \pm 0.03$                                |
|           |             | 7M                       | 3.72                                      | $-0.25 \pm 0.05$                                |
|           | Sham, 4 w   | 8M                       | 2.17                                      | $0.08 \pm 0.04$                                 |
|           |             | 9M                       | 1.83                                      | $0.34 \pm 0.04$                                 |
|           | CBDL, 4 w   | 11M                      | 3.40                                      | $-0.47 \pm 0.12$                                |
|           |             | 12M                      | 2.82                                      | $-0.31 \pm 0.05$                                |
|           | Sham, 6 w   | 15M                      | 2.26                                      | $0.13 \pm 0.04$                                 |
|           |             | 16M                      | 1.35                                      | $0.00 \pm 0.05$                                 |
|           | CBDL, 6 w   | 18M                      | 2.82                                      | $-0.25 \pm 0.05$                                |
|           |             | 19M                      | 2.51                                      | $-0.46 \pm 0.07$                                |
|           | Sham, 4 w   | 22F                      | 1.71                                      | $-0.15 \pm 0.05$                                |
|           |             | 23F                      | 3.01                                      | $0.08 \pm 0.05$                                 |
|           | CBDL, 4 w   | 25F                      | 4.38                                      | $-0.50 \pm 0.01$                                |
|           |             | 26F                      | 3.95                                      | $-0.65 \pm 0.02$                                |
|           | Sham, 6 w   | 30F                      | 1.73                                      | $0.16 \pm 0.02$                                 |
|           |             | 31F                      | 1.65                                      | $0.19 \pm 0.02$                                 |
|           | CBDL, 6 w   | 32M                      | 3.88                                      | $-0.09 \pm 0.02$                                |
|           |             | 33F                      | 3.55                                      | $-0.46 \pm 0.02$                                |
|           | Sham, 8 w   | 36F                      | 1.97                                      | $0.25 \pm 0.02$                                 |
|           |             | 37F                      | 1.73                                      | $0.09 \pm 0.02$                                 |
| CBDL, 8 w | 39F         | 3.16                     | $-0.57 \pm 0.02$                          |                                                 |
|           | 40F         | 2.55                     | $-0.59 \pm 0.02$                          |                                                 |
| Pancreas  | Sham, 2 w   | 2M                       | 1.26                                      | $-0.04 \pm 0.02$                                |
|           |             | 3M                       | 1.12                                      | $0.09 \pm 0.02$                                 |
|           | CBDL, 2 w   | 4M                       | 2.02                                      | $-0.06 \pm 0.02$                                |
|           |             | 7M                       | 1.43                                      | $-0.06 \pm 0.02$                                |
|           | Sham, 4 w   | 8M                       | 1.01                                      | $0.25 \pm 0.02$                                 |
|           |             | 9M                       | 1.15                                      | $0.42 \pm 0.02$                                 |
|           | CBDL, 4 w   | 11M                      | 1.46                                      | $-0.41 \pm 0.01$                                |
|           |             | 12M                      | 1.12                                      | $-0.31 \pm 0.02$                                |
|           | Sham, 6 w   | 15M                      | 1.26                                      | $0.32 \pm 0.02$                                 |
|           |             | 16M                      | 0.90                                      | $0.09 \pm 0.02$                                 |
|           | CBDL, 6 w   | 18M                      | 1.07                                      | $-0.45 \pm 0.02$                                |
|           |             | 19M                      | 1.52                                      | $-0.26 \pm 0.02$                                |
|           | Sham, 4 w   | 22F                      | 0.93                                      | $0.12 \pm 0.02$                                 |
|           |             | 23F                      | 1.25                                      | $0.00 \pm 0.02$                                 |
|           | CBDL, 4 w   | 25F                      | 1.19                                      | $-0.45 \pm 0.02$                                |
|           |             | 26F                      | 1.64                                      | $-0.52 \pm 0.02$                                |
|           | Sham, 6 w   | 30F                      | 0.96                                      | $0.15 \pm 0.02$                                 |
|           |             | 31F                      | 1.18                                      | $0.20 \pm 0.02$                                 |



| Sample                  | Description | Individual ID/<br>Gender | Cu concentration,<br>$\mu\text{g g}^{-1}$ | $\delta^{65}\text{Cu} \pm \text{sd} (\text{‰})$ |
|-------------------------|-------------|--------------------------|-------------------------------------------|-------------------------------------------------|
| Pancreas                | CBDL, 6 w   | 32M                      | 1.59                                      | $-0.23 \pm 0.02$                                |
|                         |             | 33F                      | 1.41                                      | $-0.45 \pm 0.02$                                |
|                         | Sham, 8 w   | 37F                      | 1.22                                      | $0.21 \pm 0.02$                                 |
|                         |             | 38F                      | 1.46                                      | $0.22 \pm 0.02$                                 |
|                         | CBDL, 8 w   | 40F                      | 2.53                                      | $-0.17 \pm 0.02$                                |
| 41F                     |             | 1.43                     | $-0.53 \pm 0.03$                          |                                                 |
| Bone                    | Sham, 2 w   | 1M                       | 1.05                                      | $0.11 \pm 0.03$                                 |
|                         |             | 2M                       | 0.99                                      | $-0.13 \pm 0.04$                                |
|                         | CBDL, 2 w   | 4M                       | 1.17                                      | $-0.14 \pm 0.05$                                |
|                         |             | 7M                       | 1.34                                      | $-0.09 \pm 0.07$                                |
|                         | Sham, 4 w   | 8M                       | 1.47                                      | $-0.01 \pm 0.07$                                |
|                         |             | 10M                      | 1.16                                      | $0.14 \pm 0.04$                                 |
|                         | CBDL, 4 w   | 11M                      | 1.66                                      | $-0.35 \pm 0.05$                                |
|                         |             | 12M                      | 1.30                                      | $-0.33 \pm 0.08$                                |
|                         | Sham, 6 w   | 15M                      | 1.26                                      | $0.02 \pm 0.05$                                 |
|                         |             | 16M                      | 1.18                                      | $-0.03 \pm 0.3$                                 |
|                         | CBDL, 6 w   | 18M                      | 1.26                                      | $-0.23 \pm 0.03$                                |
|                         |             | 19M                      | 1.48                                      | $-0.30 \pm 0.13$                                |
|                         | Sham, 4 w   | 22F                      | 1.28                                      | $0.00 \pm 0.05$                                 |
|                         |             | 23F                      | 0.83                                      | $-0.04 \pm 0.04$                                |
|                         | CBDL, 4 w   | 25F                      | 1.86                                      | $-0.30 \pm 0.03$                                |
|                         |             | 26F                      | 1.31                                      | $-0.48 \pm 0.02$                                |
|                         | Sham, 6 w   | 30F                      | 0.99                                      | $0.18 \pm 0.04$                                 |
|                         |             | 31F                      | 1.11                                      | $-0.02 \pm 0.04$                                |
|                         | CBDL, 6 w   | 32M                      | 2.04                                      | $-0.33 \pm 0.04$                                |
|                         |             | 33F                      | 1.57                                      | $-0.49 \pm 0.04$                                |
| Sham, 8 w               | 36F         | 1.15                     | $0.04 \pm 0.05$                           |                                                 |
|                         | 37F         | 1.19                     | $0.03 \pm 0.03$                           |                                                 |
| CBDL, 8 w               | 39F         | 2.46                     | $-0.48 \pm 0.04$                          |                                                 |
|                         | 40F         | 1.62                     | $-0.44 \pm 0.05$                          |                                                 |
| Muscle                  | Sham, 4 w   | 8M                       | 0.83                                      | $0.04 \pm 0.05$                                 |
|                         |             | 9M                       | 0.79                                      | $0.03 \pm 0.04$                                 |
|                         | CBDL, 4 w   | 11M                      | 0.70                                      | $-0.41 \pm 0.05$                                |
|                         |             | 12M                      | 0.74                                      | $-0.51 \pm 0.05$                                |
| Lung                    | Sham, 4 w   | 8M                       | 2.07                                      | $0.61 \pm 0.05$                                 |
|                         | CBDL, 4 w   | 11M                      | 2.74                                      | $0.03 \pm 0.05$                                 |
| Gallbladder<br>and bile | Sham, 2 w   | 43M                      | 1.25                                      | $-0.31 \pm 0.02$                                |
|                         |             | 44M                      | 2.31                                      | $-0.18 \pm 0.03$                                |
|                         | CBDL, 2 w   | 45M                      | 2.07                                      | $-0.02 \pm 0.03$                                |
|                         |             | 46M                      | 0.94                                      | $-0.15 \pm 0.05$                                |
|                         |             | 47M                      | 1.09                                      | $-0.01 \pm 0.01$                                |

| Sample                  | Description | Individual ID/<br>Gender | Cu concentration,<br>$\mu\text{g g}^{-1}$ | $\delta^{65}\text{Cu} \pm \text{sd} (\text{‰})$ |
|-------------------------|-------------|--------------------------|-------------------------------------------|-------------------------------------------------|
| Gallbladder<br>and bile | Sham, 4 w   | 48M                      | 4.64                                      | $-0.02 \pm 0.03$                                |
|                         |             | 49M                      | 5.00                                      | $0.01 \pm 0.03$                                 |
|                         | CBDL, 4 w   | 50M                      | 3.90                                      | $-0.39 \pm 0.04$                                |
|                         |             | 51M                      | 4.00                                      | $-0.10 \pm 0.03$                                |
|                         |             | 52M                      | 1.81                                      | $-0.24 \pm 0.03$                                |
| Duodenum                | Sham, 4 w   | 8M                       | 2.11                                      | $0.50 \pm 0.05$                                 |
|                         |             | 9M                       | 1.77                                      | $0.57 \pm 0.05$                                 |
|                         |             | 53M                      | 1.71                                      | $0.34 \pm 0.03$                                 |
|                         |             | 54M                      | 1.14                                      | $0.48 \pm 0.05$                                 |
|                         |             | 55M                      | 1.37                                      | $0.44 \pm 0.07$                                 |
|                         | CBDL, 4 w   | 11M                      | 2.35                                      | $0.01 \pm 0.05$                                 |
|                         |             | 12M                      | 2.34                                      | $-0.22 \pm 0.05$                                |
|                         |             | 56M                      | 2.23                                      | $0.11 \pm 0.07$                                 |
|                         |             | 57M                      | 3.07                                      | $0.05 \pm 0.10$                                 |
|                         |             | 58M                      | 2.41                                      | $0.02 \pm 0.03$                                 |
|                         | Sham, 6 w   | 15M                      | 2.51                                      | $0.55 \pm 0.04$                                 |
|                         |             | 16M                      | 1.59                                      | $0.52 \pm 0.04$                                 |
|                         | CBDL, 6 w   | 18M                      | 2.42                                      | $0.00 \pm 0.04$                                 |
|                         |             | 19M                      | 2.25                                      | $-0.12 \pm 0.03$                                |
|                         | Caecum      | Sham, 2 w                | 1M                                        | 3.02                                            |
| CBDL, 2 w               |             | 4M                       | 6.14                                      | $-0.19 \pm 0.03$                                |
|                         |             | 5M                       | 4.56                                      | $0.02 \pm 0.05$                                 |
| Sham, 6 w               |             | 15M                      | 3.52                                      | $0.19 \pm 0.08$                                 |
|                         |             | 16M                      | 3.44                                      | $0.45 \pm 0.03$                                 |
| CBDL, 6 w               |             | 18M                      | 5.27                                      | $-0.01 \pm 0.01$                                |
|                         |             | 19M                      | 5.48                                      | $-0.04 \pm 0.03$                                |
| Faeces                  | Sham, 2 w   | 2M                       | 22.1                                      | $0.06 \pm 0.03$                                 |
|                         |             | 3M                       | 43.5                                      | $0.09 \pm 0.02$                                 |
|                         | CBDL, 2 w   | 4M                       | 42.3                                      | $0.07 \pm 0.03$                                 |
|                         |             | 7M                       | 39.9                                      | $0.10 \pm 0.02$                                 |
|                         | Sham, 4 w   | 9M                       | 46.8                                      | $0.13 \pm 0.04$                                 |
|                         |             | 10M                      | 58.1                                      | $0.01 \pm 0.01$                                 |
|                         | CBDL, 4 w   | 11M                      | 39.6                                      | $0.08 \pm 0.02$                                 |
|                         |             | 12M                      | 43.9                                      | $0.08 \pm 0.03$                                 |
|                         | Sham, 6 w   | 15M                      | 44.1                                      | $0.12 \pm 0.01$                                 |
|                         |             | 16M                      | 48.2                                      | $-0.03 \pm 0.05$                                |
|                         | CBDL, 6 w   | 18M                      | 35.8                                      | $0.03 \pm 0.02$                                 |
|                         |             | 20M                      | 47.4                                      | $0.15 \pm 0.05$                                 |
|                         | Sham, 4 w   | 22F                      | 28.3                                      | $0.04 \pm 0.01$                                 |
|                         |             | 23F                      | 63.6                                      | $0.10 \pm 0.01$                                 |

| Sample | Description | Individual ID/<br>Gender | Cu concentration,<br>$\mu\text{g g}^{-1}$ | $\delta^{65}\text{Cu} \pm \text{sd} (\text{‰})$ |
|--------|-------------|--------------------------|-------------------------------------------|-------------------------------------------------|
| Faeces | CBDL, 4 w   | 25F                      | 35.2                                      | $0.08 \pm 0.01$                                 |
|        |             | 26F                      | 32.6                                      | $0.11 \pm 0.03$                                 |
|        | Sham, 6 w   | 30F                      | 47.6                                      | $0.19 \pm 0.01$                                 |
|        |             | 31F                      | 86.3                                      | $0.22 \pm 0.02$                                 |
|        | CBDL, 6 w   | 32M                      | 27.0                                      | $0.09 \pm 0.01$                                 |
|        |             | 33F                      | 18.4                                      | $0.11 \pm 0.02$                                 |
|        | Sham, 8 w   | 36F                      | 26.5                                      | $0.04 \pm 0.01$                                 |
|        |             | 37F                      | 29.5                                      | $0.11 \pm 0.01$                                 |
|        | CBDL, 8 w   | 39F                      | 38.4                                      | $0.10 \pm 0.02$                                 |
|        |             | 40F                      | 57.1                                      | $0.08 \pm 0.02$                                 |
| Food   | 2 w         | M                        | 16.4                                      | $0.09 \pm 0.03$                                 |
|        |             | M                        | 24.4                                      | $0.12 \pm 0.01$                                 |
|        | 4 w         | F                        | 20.7                                      | $0.17 \pm 0.02$                                 |
|        |             | F                        | 20.7                                      | $0.10 \pm 0.02$                                 |
|        | 4 w         | M                        | 17.8                                      | $0.14 \pm 0.01$                                 |
|        |             | M                        | 23.5                                      | $0.04 \pm 0.02$                                 |
|        | 6 w         | F                        | 15.8                                      | $0.06 \pm 0.02$                                 |
|        |             | F                        | 18.0                                      | $0.18 \pm 0.01$                                 |
|        | 6 w         | M                        | 16.5                                      | $0.12 \pm 0.01$                                 |
|        |             | M                        | 14.0                                      | $0.19 \pm 0.02$                                 |
| 8 w    | F           | 15.4                     | $0.10 \pm 0.02$                           |                                                 |
|        | F           | 14.2                     | $0.15 \pm 0.05$                           |                                                 |

| Sample            | Description | Gender | Cu concentration,<br>$\mu\text{g L}^{-1}$ | $\delta^{65}\text{Cu} \pm \text{sd} (\text{‰})$ |
|-------------------|-------------|--------|-------------------------------------------|-------------------------------------------------|
| Serum             | Sham, 2 w   | M      | 0.54                                      | $-0.88 \pm 0.07$                                |
|                   | CBDL, 2 w   | M      | 1.99                                      | $-0.91 \pm 0.01$                                |
|                   |             | M      | 1.52                                      | $-1.27 \pm 0.01$                                |
|                   | Sham, 4 w   | M      | 0.53                                      | $-0.66 \pm 0.02$                                |
|                   | CBDL, 4 w   | M      | 1.63                                      | $-1.20 \pm 0.01$                                |
|                   |             | M      | 1.81                                      | $-1.08 \pm 0.04$                                |
|                   | Sham, 6 w   | M      | 0.62                                      | $-0.64 \pm 0.02$                                |
|                   | CBDL, 6 w   | M      | 1.96                                      | $-1.26 \pm 0.04$                                |
|                   | Sham, 4 w   | F      | 0.59                                      | $-0.71 \pm 0.02$                                |
|                   |             | F      | 0.52                                      | $-0.49 \pm 0.02$                                |
|                   | CBDL, 4 w   | F      | 1.69                                      | $-1.43 \pm 0.02$                                |
|                   |             | F      | 2.02                                      | $-1.28 \pm 0.02$                                |
|                   | Sham, 6 w   | F      | 0.83                                      | $-0.73 \pm 0.01$                                |
|                   | CBDL, 6 w   | M      | 2.49                                      | $-1.20 \pm 0.07$                                |
|                   | Sham, 8 w   | F      | 0.44                                      | $-0.55 \pm 0.02$                                |
|                   | CBDL, 8 w   | F      | 2.36                                      | $-1.54 \pm 0.06$                                |
| F                 |             | 2.27   | $-1.50 \pm 0.04$                          |                                                 |
| Whole<br>blood    | Sham, 6 w   | M      | 0.53                                      | $0.19 \pm 0.04$                                 |
|                   |             | M      | 0.50                                      | $-0.07 \pm 0.05$                                |
|                   | CBDL, 6 w   | M      | 1.35                                      | $-0.62 \pm 0.02$                                |
|                   |             | M      | 1.77                                      | $-0.82 \pm 0.04$                                |
| Drinking<br>water | 2 w         | M      | 6.03                                      | $-0.30 \pm 0.02$                                |
|                   | 4 w         | M      | 5.68                                      | $0.08 \pm 0.02$                                 |
|                   | 4 w         | F      | 16.3                                      | $-0.20 \pm 0.02$                                |
|                   | 6 w         | M      | 3.08                                      | $0.03 \pm 0.02$                                 |
|                   | 6 w         | F      | 6.27                                      | $-0.05 \pm 0.03$                                |
|                   | 8 w         | F      | 12.1                                      | $-0.19 \pm 0.01$                                |

\* Serum samples from several individuals were pooled.
